# Supplementary material for: Arrhythmic Risk Stratification by Cardiovascular Magnetic Resonance Imaging in Patients With Nonischemic Cardiomyopathy
Source: PubMed Central journal article supplement (PMC11444937; doi:10.1016/j.jacc.2024.06.046), 2024-10-08
Supplement: mmc1.pdf [file mmc1.pdf]

**Cardiovascular Magnetic Resonance for Arrhythmic Risk Stratification in  
Non-Ischemic Cardiomyopathy**

**SUPPLEMENTARY APPENDIX**

**CONTENTS**

| <b>Page</b> |                                                                                                    |
|-------------|----------------------------------------------------------------------------------------------------|
| 2.          | <b>Table S1. Myocardial Fibrosis Measures Using Different Signal Threshold Methods.</b>            |
| 2.          | <b>Table S2. Univariate and Multivariable Analyses.</b>                                            |
| 3.          | <b>Table S3: Myocardial Fibrosis Measures in Relation to the Primary Endpoint in Both Cohorts.</b> |
| 4.          | <b>Table S4. Comparison of C Statistics.</b>                                                       |
| 4.          | <b>Table S5. Harrel C Statistics and Uno's C Statistics in the Derivation Cohort.</b>              |
| 5.          | <b>Table S6: Risk Reclassification Analyses: MF<sub>VA</sub> over LVEF.</b>                        |
| 6.          | <b>Table S7: Risk reclassification ana Risk Reclassification Analyses: TF2SD mass over MFVA.</b>   |
| 7.          | <b>Table S8: Risk Reclassification Analyses: GZF<sub>3SD</sub> mass over MF<sub>VA</sub>.</b>      |
| 8.          | <b>Figure S1. Quantified TF and GZF in Relation to the Primary Endpoint.</b>                       |
| 9.          | <b>Figure S2. Decision Curve Analysis</b>                                                          |

**Table S1. Myocardial Fibrosis Measures Using Different Signal Threshold Methods.**

|                         | <b>Derivation Cohort</b> | <b>Validation Cohort</b> | <b>p</b> |
|-------------------------|--------------------------|--------------------------|----------|
| <b>N</b>                | <b>292</b>               | <b>480</b>               |          |
| TF <sub>FWHM</sub> , g  | 6.56 (3.60-11.3)         | 3.49 (1.37-7.39)         | <0.001   |
| TF <sub>2SD</sub> , g   | 8.51 (5.19-14.0)         | 4.07 (1.66-9.57)         | <0.001   |
| TF <sub>3SD</sub> , g   | 5.59 (3.18-9.51)         | 2.18 (0.80-5.55)         | <0.001   |
| TF <sub>5SD</sub> , g   | 2.05 (1.11-3.44)         | 0.61 (0.13-1.72)         | <0.001   |
| GZF <sub>FWHM</sub> , g | 2.27 (1.02-4.36)         | 1.15 (0.17-3.20)         | <0.001   |
| GZF <sub>3SD</sub> , g  | 2.84 (1.67-4.24)         | 1.79 (0.79-3.58)         | <0.001   |
| GZF <sub>5SD</sub> , g  | 6.13 (3.80-9.86)         | 3.41 (1.45-7.33)         | <0.001   |

Myocardial fibrosis measures using 2-, 3- and 5 standard deviation (SD) signal threshold methods in patients with myocardial fibrosis present on visual assessment, in derivation and validation cohorts. All values are expressed as median (interquartile range), in grammes.

FWHM = full width half maximum; GZF = gray zone fibrosis; TF = total fibrosis.

**Table S2. Univariate and Multivariable Analyses.**

|                          | <b>HR</b> | <b>95% CI</b> |      | <b>p</b> |
|--------------------------|-----------|---------------|------|----------|
| <b>Derivation Cohort</b> |           |               |      |          |
| <b>Univariate</b>        |           |               |      |          |
| MF <sub>VA</sub> present | 5.83      | 3.15          | 10.8 | <0.001   |
| LVEF<35%                 | 1.91      | 1.11          | 3.29 | 0.020    |
| <b>Multivariable</b>     |           |               |      |          |
| MF <sub>VA</sub> present | 5.52      | 2.97          | 10.2 | <0.001   |
| LVEF<35%                 | 1.52      | 0.88          | 2.64 | 0.132    |
| <b>Validation Cohort</b> |           |               |      |          |
| <b>Univariate</b>        |           |               |      |          |
| MF <sub>VA</sub> present | 3.49      | 1.44          | 8.45 | 0.006    |
| LVEF<35%                 | 1.99      | 0.99          | 4.01 | 0.053    |
| <b>Multivariable</b>     |           |               |      |          |
| MF <sub>VA</sub> present | 3.87      | 1.58          | 9.49 | 0.003    |
| LVEF<35%                 | 2.32      | 1.14          | 4.73 | 0.021    |

Data presented as subdistribution hazard ratios with 95% confidence intervals (CI) and p values from competing risk Cox proportional hazard models.

1 **Table S3: Myocardial Fibrosis Measures in Relation to the Primary Endpoint in Both Cohorts.**

2

|                     | Derivation Cohort (N=866) |          |      | Validation Cohort (N=848) |          |      |      |        |
|---------------------|---------------------------|----------|------|---------------------------|----------|------|------|--------|
|                     | SHR                       | 95% C.I. | p    | SHR                       | 95% C.I. | p    |      |        |
| <b>TF measures</b>  |                           |          |      |                           |          |      |      |        |
| TF <sub>FWHM</sub>  | 1.05                      | 1.02     | 1.08 | <0.001                    | 1.05     | 1.02 | 1.08 | <0.001 |
| TF <sub>2SD</sub>   | 1.05                      | 1.04     | 1.07 | <0.001                    | 1.02     | 1.01 | 1.04 | 0.001  |
| TF <sub>3SD</sub>   | 1.03                      | 1.01     | 1.04 | 0.002                     | 1.03     | 1.01 | 1.04 | 0.002  |
| TF <sub>5SD</sub>   | 1.03                      | 1.01     | 1.06 | 0.013                     | 1.03     | 1.01 | 1.06 | 0.013  |
| <b>GZF measures</b> |                           |          |      |                           |          |      |      |        |
| GZF <sub>FWHM</sub> | 1.02                      | 0.99     | 1.05 | 0.125                     | 1.02     | 0.99 | 1.05 | 0.125  |
| GZF <sub>3SD</sub>  | 1.16                      | 1.11     | 1.22 | <0.001                    | 1.10     | 1.03 | 1.17 | 0.002  |
| GZF <sub>5SD</sub>  | 1.05                      | 1.02     | 1.07 | 0.001                     | 1.05     | 1.02 | 1.07 | 0.001  |

3

4 Data presented as subdistribution hazard ratios with 95% confidence intervals (CI) and p values from competing risk Cox proportional hazard  
5 models. For myocardial fibrosis (MF) measures, patients without MF<sub>VA</sub> on visual assessment were used as reference.

6

7 GZF = gray zone fibrosis; TF = total fibrosis; FWHM = full width, half-maximum. The other subscripts refer to the method used to in  
8 quantification, in terms of standard deviations.

9

10

11

1 **Table S4. Comparison of C Statistics.**

2

|                          | LVEF < 35% | LVEF (%) |
|--------------------------|------------|----------|
| <b>Derivation Cohort</b> |            |          |
| MF <sub>VA</sub>         | 0.004      | -        |
| TF <sub>2SD</sub> , g    | -          | 0.037    |
| GZF <sub>3SD</sub> , g   | -          | 0.032    |
| <b>Validation Cohort</b> |            |          |
| MF <sub>VA</sub>         | 0.504      | -        |
| TF <sub>2SD</sub> , g    | -          | 0.039    |
| GZF <sub>3SD</sub> , g   | -          | 0.050    |

3

4 Results of comparison of C statistics in relation to the primary endpoint are shown in terms of  
5 p values.

6

7

8 **Table S5. Harrel C Statistics and Uno's C Statistics in the Derivation Cohort.**

|                                 | Harrell's C statistic | Uno's C statistic |
|---------------------------------|-----------------------|-------------------|
| LVEF (%)                        | 0.63                  | 0.63              |
| LVEF < 35%                      | 0.58                  | 0.58              |
| MF <sub>VA</sub>                | 0.72                  | 0.68              |
| MF <sub>VA</sub> and LVEF < 35% | 0.74                  | 0.71              |
| TF <sub>2SD</sub>               | 0.75                  | 0.70              |
| TF <sub>2SD</sub> and LVEF (%)  | 0.73                  | 0.70              |
| GZF <sub>3SD</sub>              | 0.75                  | 0.70              |
| GZF <sub>3SD</sub> and LVEF (%) | 0.72                  | 0.69              |

9

10 Results of Harrell's c statistics and Uno's c statistics for LVEF and myocardial fibrosis  
11 measures.

12

1 **Table S6: Risk Reclassification Analyses: MF<sub>VA</sub> over LVEF.**

|                     | Model with LVEF<35 and MF <sub>VA</sub> |        |      |       |
|---------------------|-----------------------------------------|--------|------|-------|
| Model with LVEF<35% | 0-5%                                    | 10-15% | >15% | Total |
| 0-5%                | 340                                     | 132    |      | 472   |
|                     | 2.65                                    | 12.9   |      | 5.51  |
|                     | 4.63                                    | 4.63   |      | 4.63  |
|                     | 2.1                                     | 10.8   |      | 4.53  |
| 5-10%               | 234                                     | 64     | 96   | 394   |
|                     | 2.14                                    | 15.6   | 11.5 | 6.60  |
|                     | 7.56                                    | 6.16   | 8.95 | 7.67  |
|                     | 2.93                                    | 12.9   | 16.3 | 7.8   |
| Total               | 574                                     | 196    | 96   | 866   |
|                     | 2.44                                    | 13.8   | 11.5 | 6.00  |
|                     | 5.82                                    | 5.13   | 8.95 | 6.01  |
|                     | 2.44                                    | 11.46  | 16.3 | 6.02  |

2

|           | NRI (95% CI)         |
|-----------|----------------------|
| Event     | 0.462 (0.208, 0.682) |
| Non-event | 0.376 (0.312, 0.440) |
| Overall   | 0.837 (0.580, 1.063) |

3

4 Category-free net reclassification analyses of myocardial fibrosis by visual assessment  
5 (MF<sub>VA</sub>) in relation to the primary composite arrhythmic endpoint in derivation sample, using  
6 LVEF<35% as the base model.

7

8 NRI = net reclassification improvement.

9

1 **Table S7: Risk reclassification and Risk Reclassification Analyses: TF<sub>2SD</sub> mass over MF<sub>VA</sub>.**

|                             | Model with MF <sub>VA</sub> and TF <sub>2SD</sub> mass |       |      |       |
|-----------------------------|--------------------------------------------------------|-------|------|-------|
| Model with MF <sub>VA</sub> | 0-5%                                                   | 5-10% | >15% | Total |
| 0-5%                        | 574                                                    |       |      | 574   |
|                             | 2.44                                                   |       |      | 2.44  |
|                             | 2.44                                                   |       |      | 2.44  |
|                             | 2.44                                                   |       |      | 2.44  |
| 10-15%                      |                                                        | 180   | 112  | 292   |
|                             |                                                        | 9.44  | 18.8 | 13.0  |
|                             |                                                        | 13.0  | 13.0 | 13.0  |
|                             |                                                        | 9.45  | 18.8 | 13.0  |
| Total                       | 574                                                    | 180   | 112  | 866   |
|                             | 2.44                                                   | 9.44  | 18.8 | 6.00  |
|                             | 2.44                                                   | 13.0  | 13.0 | 6.01  |
|                             | 2.44                                                   | 9.45  | 18.8 | 6.01  |

2

|           | NRI (95% CI)          |
|-----------|-----------------------|
| Event     | 0.077 (-0.252, 0.314) |
| Non-event | 0.088 (0.021, 0.179)  |
| Overall   | 0.165 (-0.219, 0.418) |

3

4 Category-free net reclassification analyses of total fibrosis using the 2 SD method (TF<sub>2SD</sub>) in  
5 relation to the primary composite arrhythmic endpoint in derivation sample, using myocardial  
6 fibrosis by visual assessment (MF<sub>VA</sub>) as the base model.

7

8 NRI = net reclassification improvement.

9

10

1 **Table S8: Risk Reclassification Analyses: GZF<sub>3SD</sub> mass over MF<sub>VA</sub>.**

|                             | Model with MF <sub>VA</sub> and GZF <sub>3SD</sub> mass |       |      |       |
|-----------------------------|---------------------------------------------------------|-------|------|-------|
| Model with MF <sub>VA</sub> | 0-5%                                                    | 5-10% | >15% | Total |
| 0-5%                        | 574                                                     |       |      | 574   |
|                             | 2.44                                                    |       |      | 2.44  |
|                             | 2.44                                                    |       |      | 2.44  |
|                             | 2.44                                                    |       |      | 2.44  |
| 10-15%                      |                                                         | 157   | 135  | 292   |
|                             |                                                         | 8.28  | 18.5 | 13.0  |
|                             |                                                         | 13.1  | 13.1 | 13.1  |
|                             |                                                         | 8.29  | 18.6 | 13.1  |
| Total                       | 574                                                     | 157   | 135  | 866   |
|                             | 2.44                                                    | 8.28  | 18.5 | 6.00  |
|                             | 2.44                                                    | 13.1  | 13.1 | 6.03  |
|                             | 2.44                                                    | 8.29  | 18.6 | 6.02  |

2

3

|           | NRI (95% CI)         |
|-----------|----------------------|
| Event     | 0.231 (0.000, 0.460) |
| Non-event | 0.042 (0.000, 0.135) |
| Overall   | 0.273 (0.054, 0.512) |

4

5

6 Category-free net reclassification analyses of gray zone fibrosis using the 3 SD method  
7 (GZF<sub>3SD</sub>) in relation to the primary composite arrhythmic endpoint in derivation sample,  
8 using myocardial fibrosis by visual assessment (MF<sub>VA</sub>) as the base model.

9

10 NRI = net reclassification improvement.

11

1 **Figure S1. Quantified TF and GZF in Relation to the Primary Endpoint.**

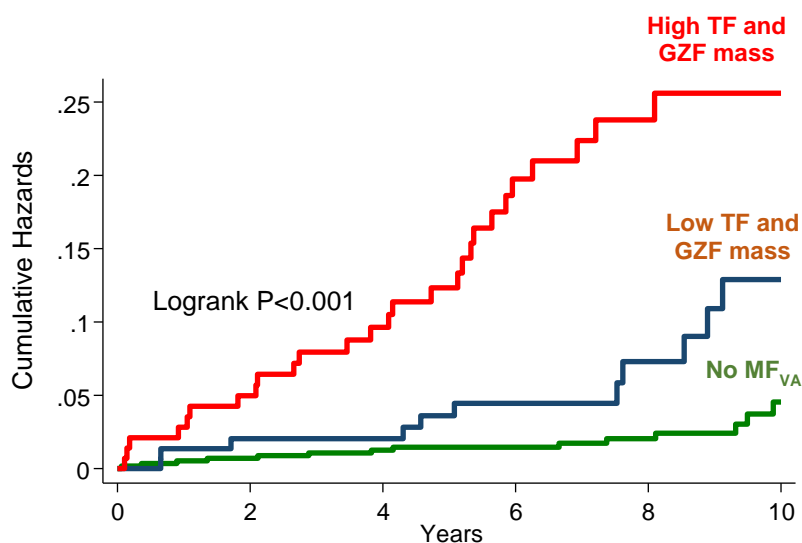

11 Number at risk

|    |                      |     |     |     |     |     |     |
|----|----------------------|-----|-----|-----|-----|-----|-----|
| 11 | No MF <sub>VA</sub>  | 574 | 553 | 505 | 405 | 269 | 111 |
| 12 | Low TF and GZF mass  | 149 | 144 | 134 | 88  | 60  | 32  |
| 13 | High TF and GZF mass | 143 | 130 | 104 | 70  | 42  | 20  |

14 Cumulative hazard estimates of the primary arrhythmic endpoint in the derivation cohort,  
 15 stratified according to the combination of total fibrosis (TF) mass using the 2 SD method  
 16 (low:  $>0$  and  $\leq 10$  g; high:  $>10$  g) and gray zone fibrosis (GZF) mass using the 3 SD method  
 17 (low:  $>0$  and  $\leq 3$  g; high:  $>3$  g). A 'low TF and GZF' means a TF  $>0$  and  $\leq 10$  g and a GZF  $>0$   
 18 and  $\leq 3$  g.

19 MF<sub>VA</sub> = myocardial fibrosis on visual assessment

20  
21  
22



1 **Figure S2. Decision Curve Analysis.**

2

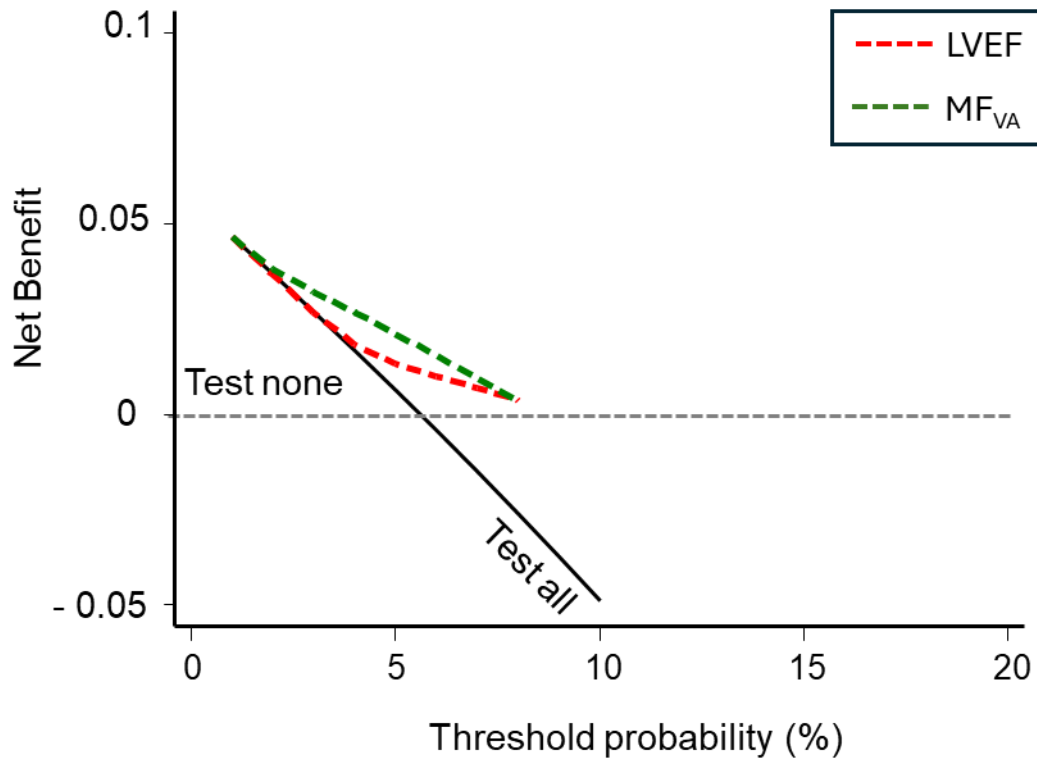

3

4

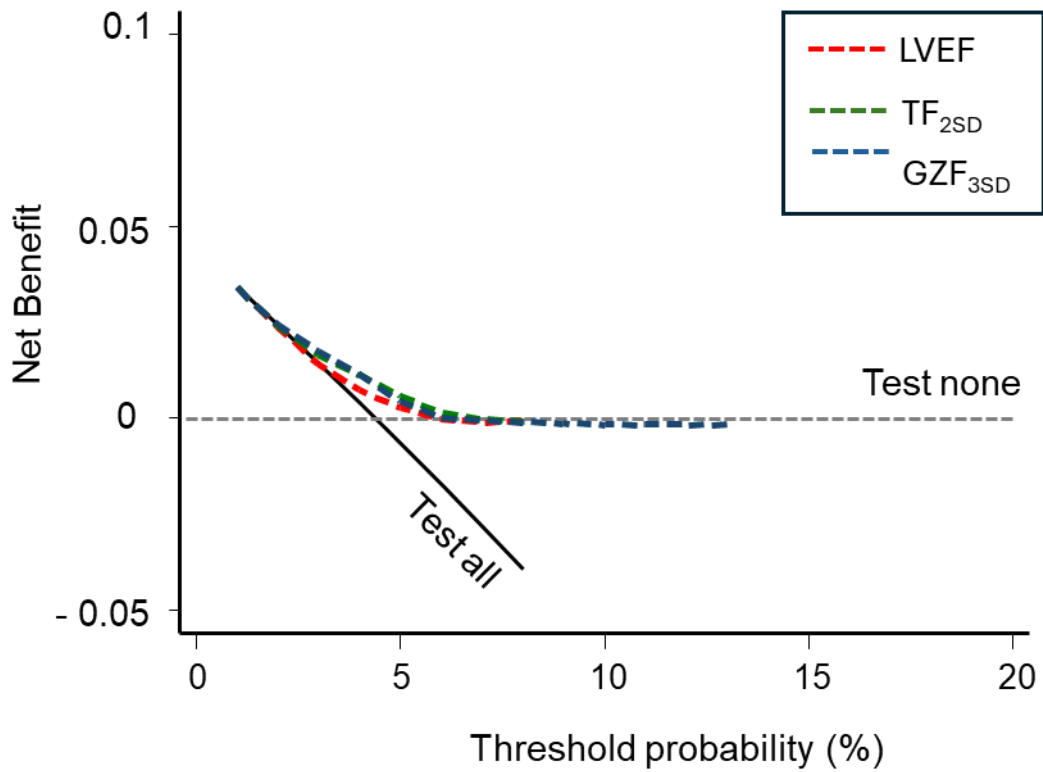

5

1 The graphs show decision curves in the validation cohort, comparing the net benefit of  
2 myocardial fibrosis (MF) (y axis) across different thresholds probabilities of the primary  
3 endpoint (x axis). The decision curve reflects the trade-off between true-positive predictions  
4 and false-positive predictions for a given strategy. The area under the decision curve  
5 quantifies the overall clinical utility of the predictive model. The dotted horizontal, gray line  
6 indicates the net benefit of not testing any patient ('test none') whereas the solid diagonal line  
7 shows the net benefit of testing all patients ('test all'). The dashed, coloured decision curves  
8 indicate the net benefit of using LVEF or MF measures in prediction models.  
9  
10  $GZF_{3SD}$  = gray zone fibrosis according to the 3 SD method;  $MF_{VA}$  = myocardial fibrosis on  
11 visual assessment; SD = standard deviation;  $TF_{2SD}$  = total fibrosis according to the 2 SD  
12 method.
